# Supplementary material
Source: Springer Nature journal article supplement (https://www.springermedizin.de/resource/supplementary/12885_2010_2617_MOESM4_ESM.pdf/9461582)

# OSA8

rhOncostatin M  
50ng/mL

0'

15'

Src

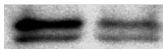

IP: gp130

STAT3

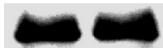

gp130

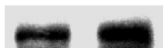

$\beta$ -actin

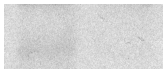

# SJSA

rhOncostatin M  
50ng/mL

0'

15'

Src

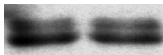

IP: gp130

STAT3

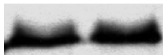

gp130

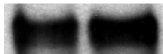

$\beta$ -actin

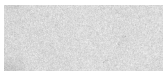

Supplement: MOESM4 [file 9461582]
